# Supplementary material
Source: PubMed Central journal article supplement (PMC9545007)
Supplement: HEP-74-2395-s001.pdf [file HEP-74-2395-s001.pdf]

**Supplemental Material for Comparison of Novel Biomarkers with Conventional HBV Markers among Untreated Adults with Chronic Hepatitis B in North America**

**Figure S1:** Consort diagram of derivation of study cohort.

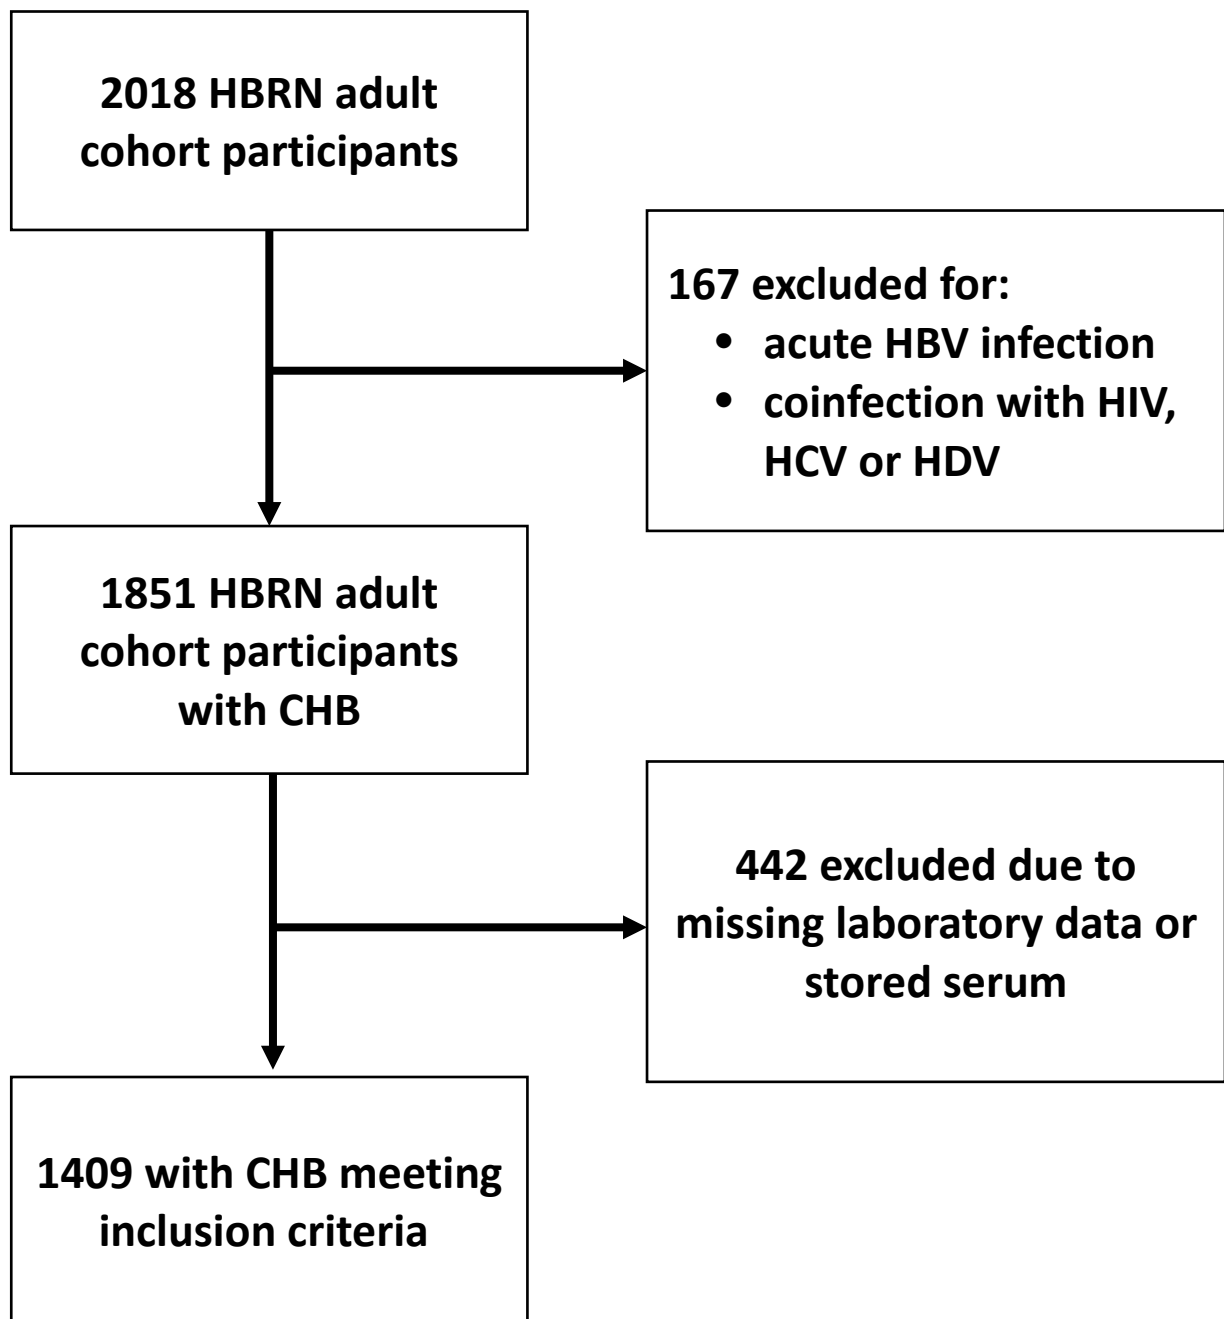

**Figure S2: HBV Phase Allocation.**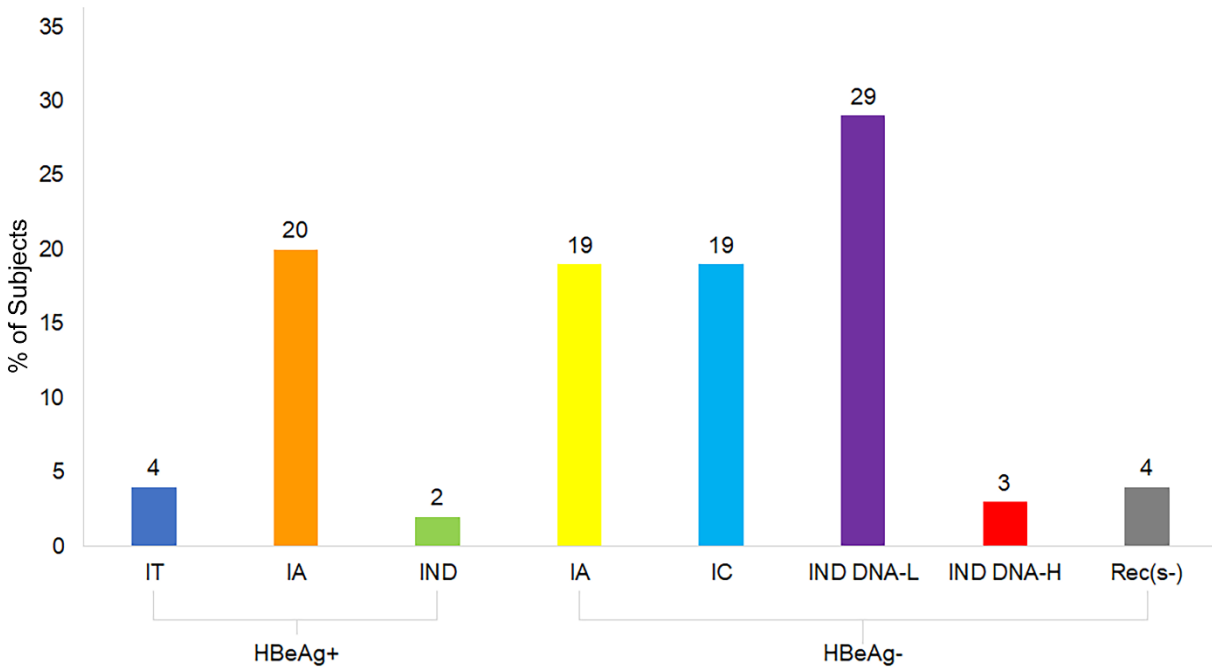

IT(e+) = immunetolerant, IA(e+) = HBeAg positive immuneactive, IND(e+) = indeterminant HBeAg positive, IA(e-) = HBeAg negative immuneactive , IC(e-) = inactive carrier, IND(e-)DNA-L = indeterminant HBeAg negative HBV DNA low, IND(e-)DNA-H = indeterminant HBeAg negative HBV DNA high, and Rec(s-) = Recovered HBsAg negative.

**Figure S3:** HBV RNA ( $\log_{10}$  U/mL) by HBcrAg ( $\log_{10}$  U/mL) categories, stratified by HBeAg status.

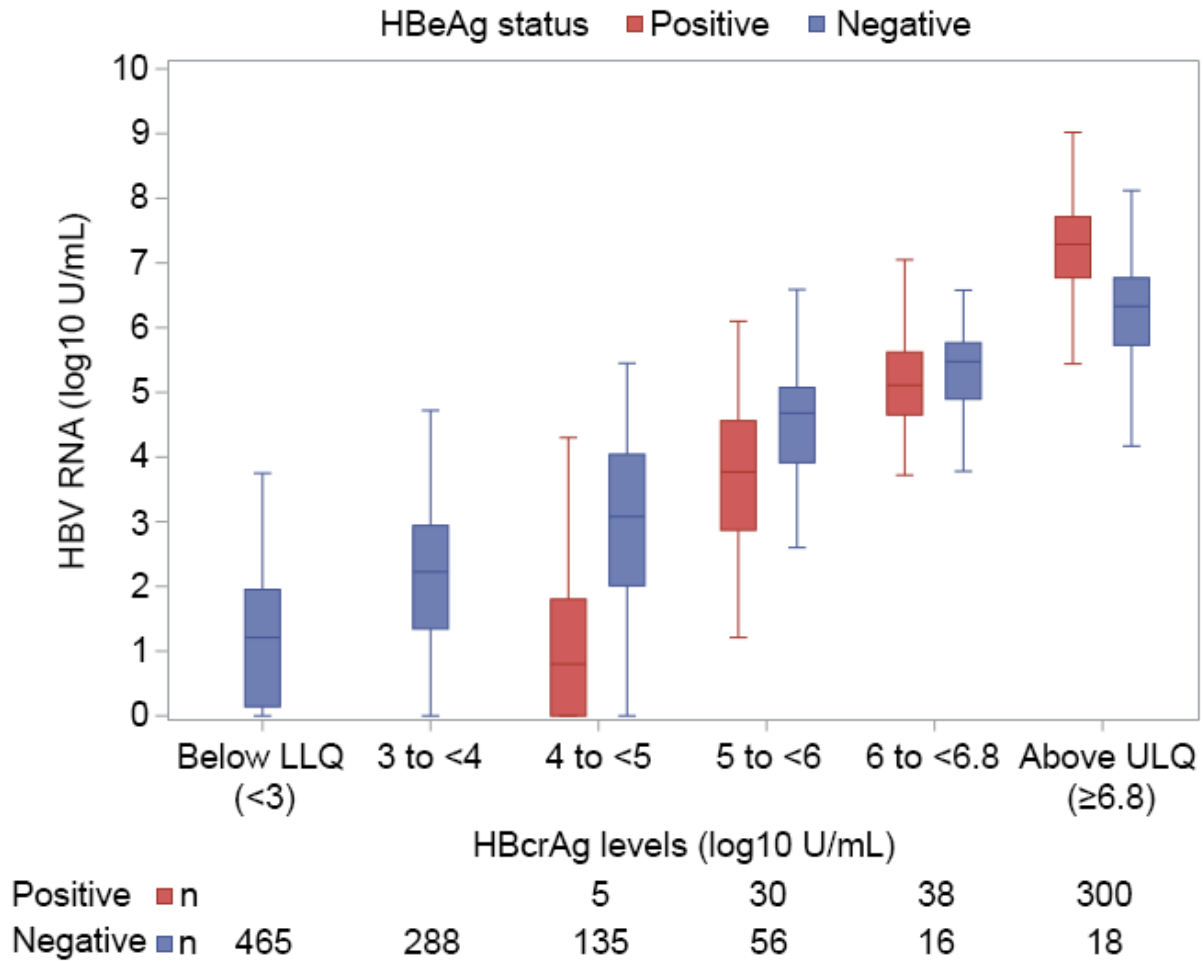

HBeAg positive participants depicted by red boxes and HBeAg negative participants by blue boxes. In box-whisker plots, upper and lower ends of the boxes = upper and lower quartiles, horizontal line = median, and upper and lower whiskers = highest and lowest observations.

**Figure S4:** HBV DNA/HBV RNA ratio by CHB Phase.

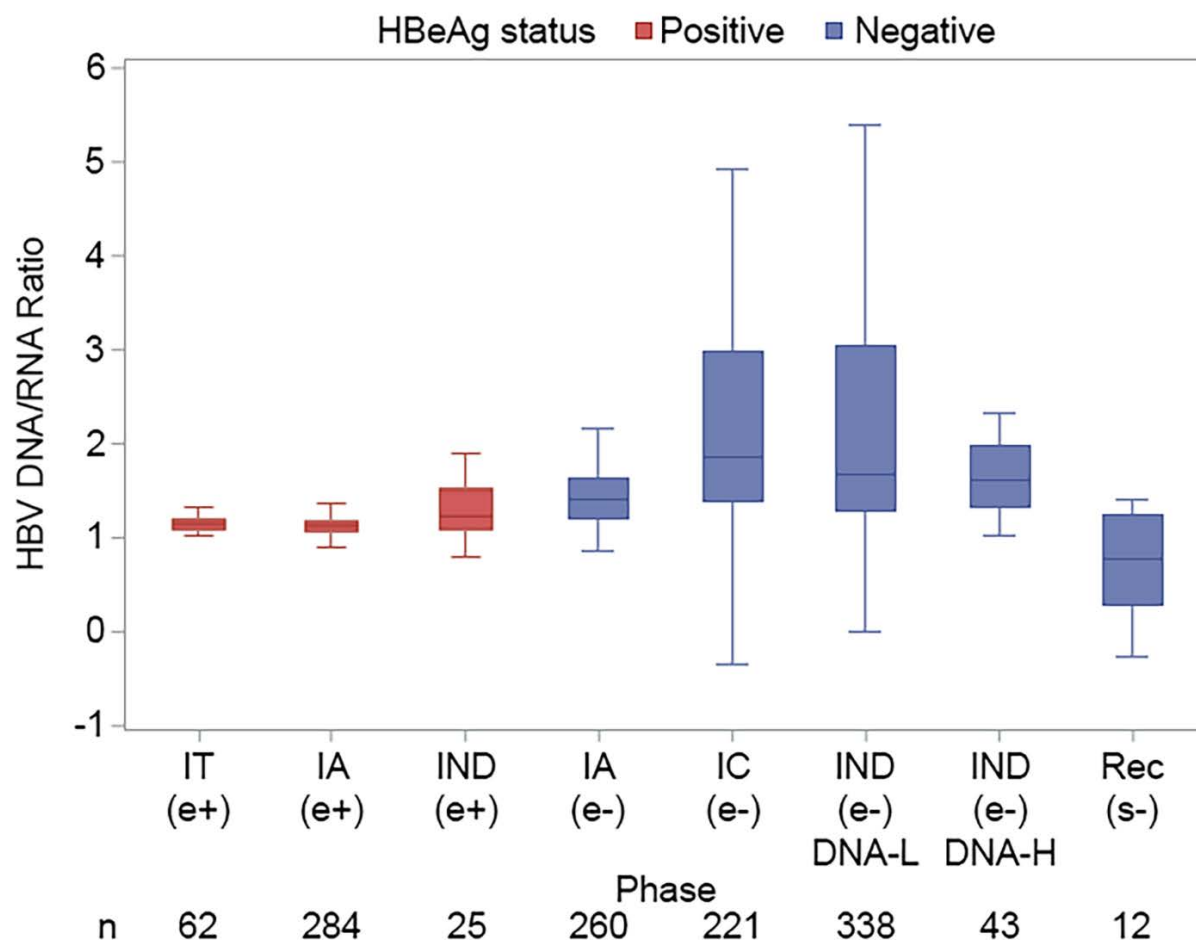

HBeAg positive participants depicted by red boxes and HBeAg negative participants by blue boxes. In box-whisker plots, upper and lower ends of the boxes = upper and lower quartiles, horizontal line = median, and upper and lower whiskers = highest and lowest observations. IT(e+) = immunetolerant, IA(e+) = HBeAg positive immuneactive, IA(e-) = HBeAg negative immuneactive, IC(e-) = inactive carrier, IND(e-)DNA-L = indeterminant HBeAg negative HBV DNA low, IND(e-)DNA-H = indeterminant HBeAg negative HBV DNA high, and Rec(s-) = Recovered HBsAg negative. n= numbers of participants in each CHB phase.

**Figure S5:** HBV DNA/HBV RNA ratio by genotype, stratified by HBeAg status.

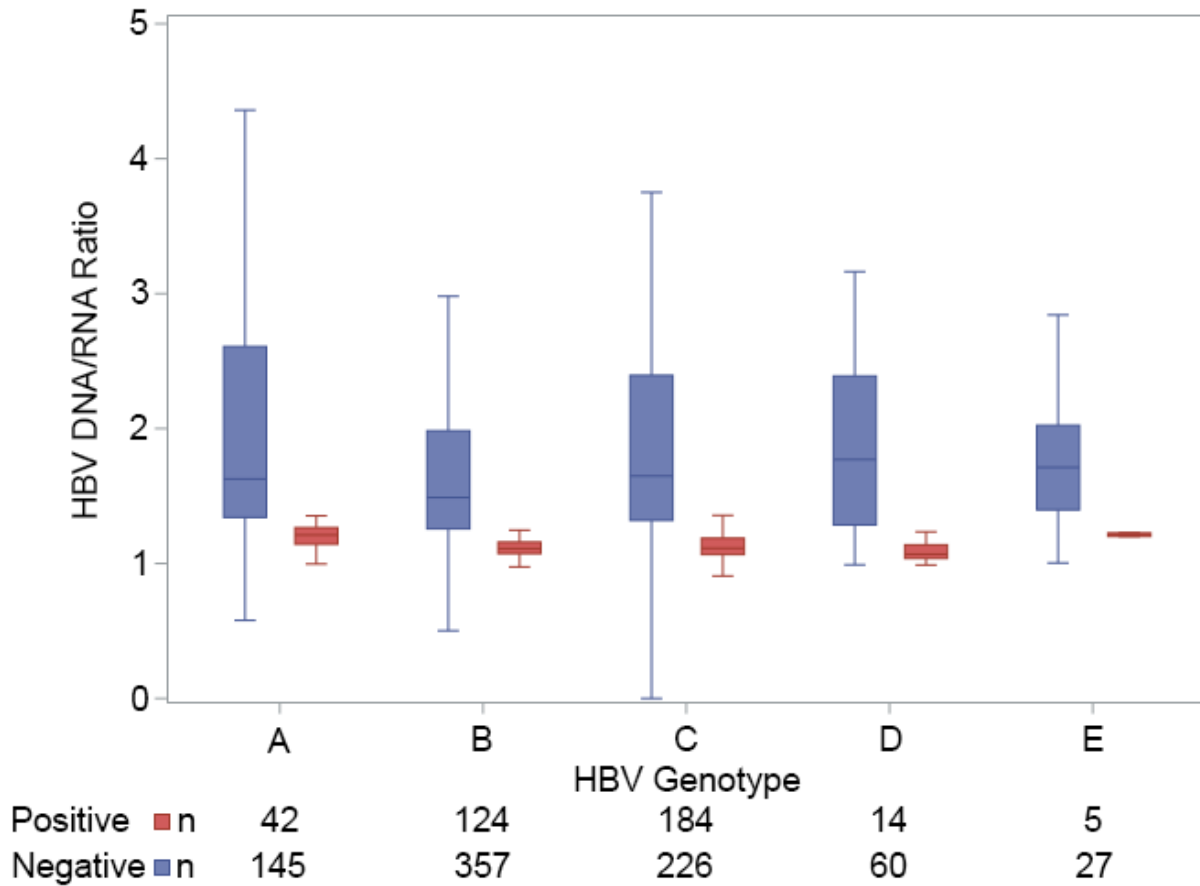

HBeAg positive participants depicted by red boxes and HBeAg negative participants by blue boxes. In box-whisker plots, upper and lower ends of the boxes = upper and lower quartiles, horizontal line = median, and upper and lower whiskers = highest and lowest observations.

**Figure S6:** qHBeAg (log<sub>10</sub> IU/mL) by HBV RNA (log<sub>10</sub> U/mL) and HBcrAg (log<sub>10</sub> U/mL) categories, respectively, in HBeAg positive participants

A. qHBeAg by HBV RNA (participants depicted by red triangles)

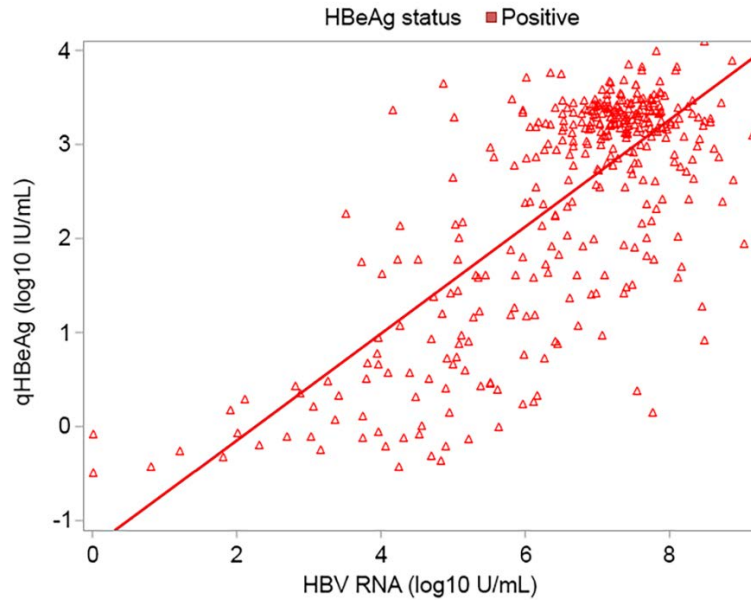

B. qHBeAg by HBcrAg categories

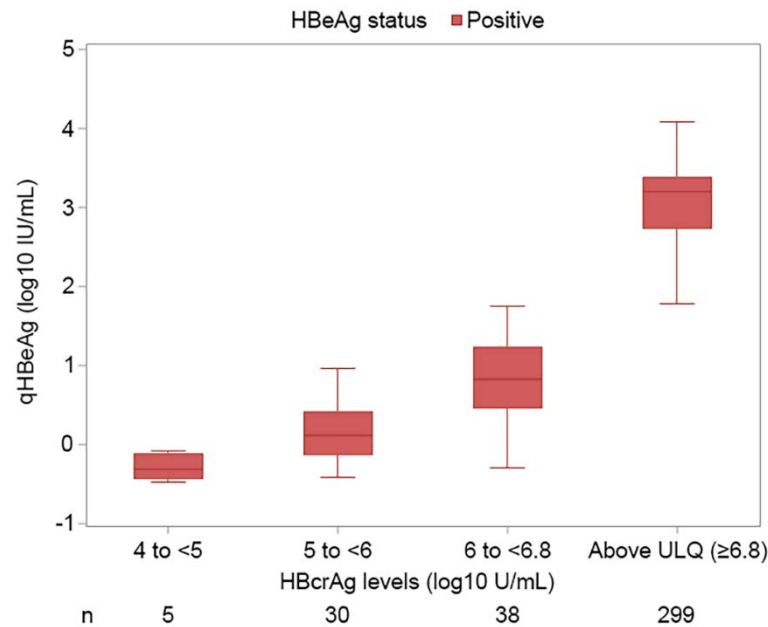

Upper and lower ends of the boxes = upper and lower quartiles, horizontal line = median, and upper and lower whiskers = highest and lowest observations.

**Figure S7:** Distribution of HBV RNA ( $\log_{10}$  U/mL) by genotype\*, stratified by HBeAg status.

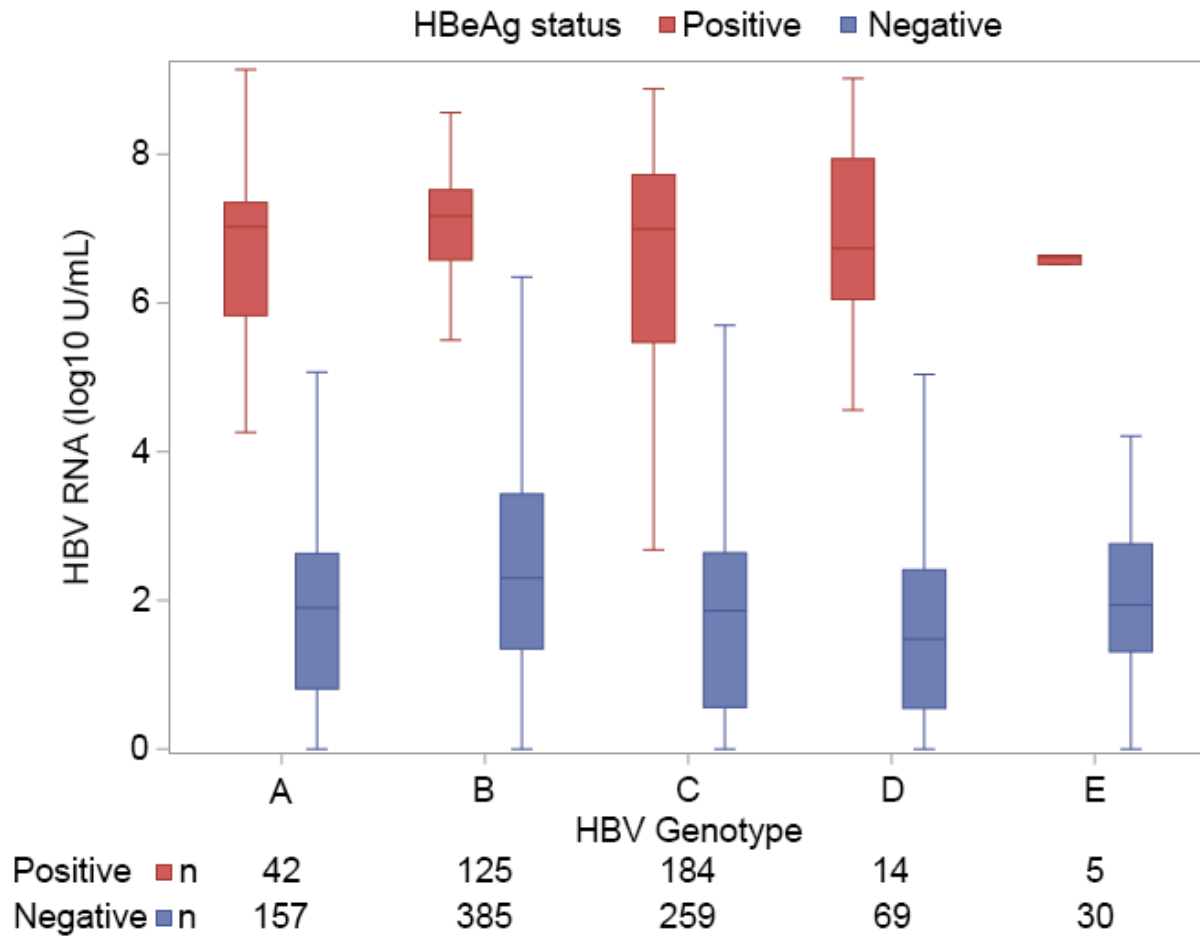

HBeAg positive participants depicted by red boxes and HBeAg negative participants by blue boxes. In box-whisker plots, upper and lower ends of the boxes = upper and lower quartiles, horizontal line = median, and upper and lower whiskers = highest and lowest observations.

**Figure S8:** Distribution of HBcrAg ( $\log_{10}$  U/mL) categories by genotype, stratified by HBeAg status.

A. HBcrAg by HBV genotype in HBeAg positive participants

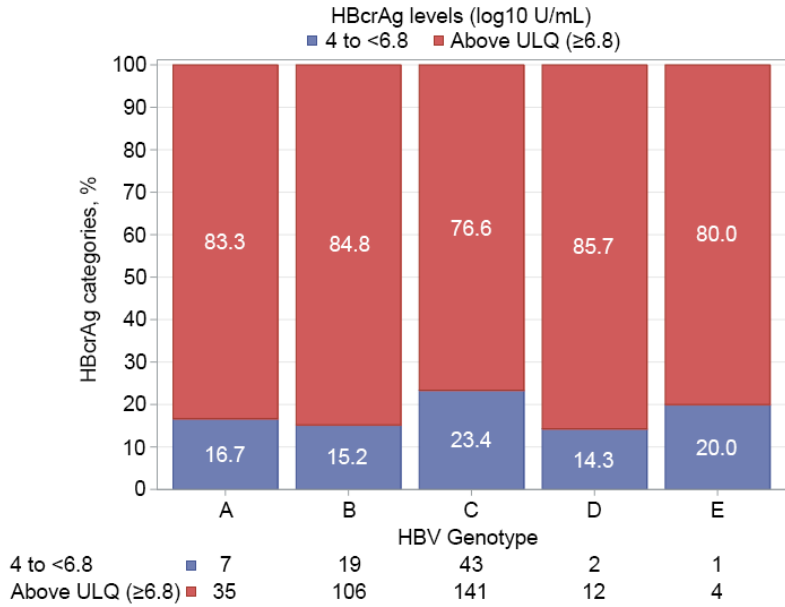

B. HBcrAg by HBV genotype in HBeAg negative participants

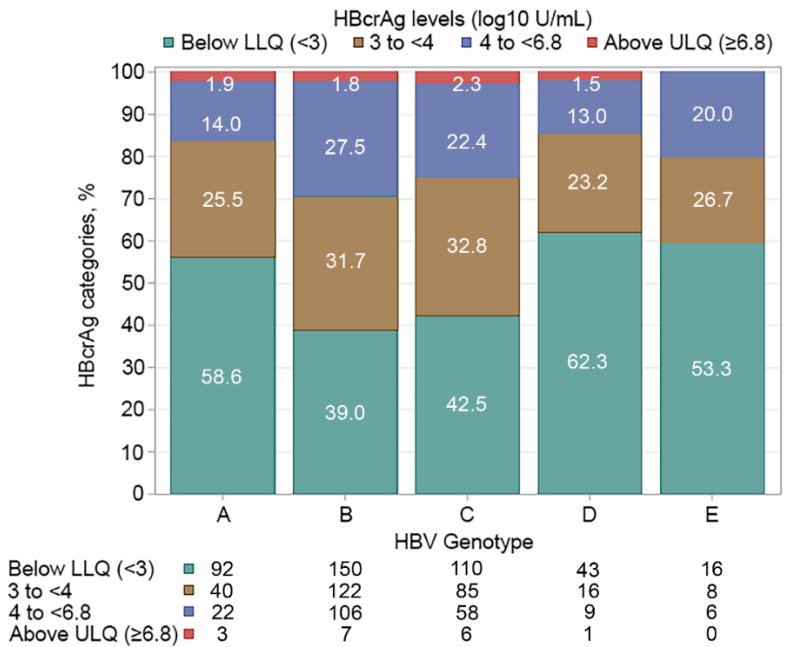

Green bars = HBcrAg below lower limit of detection, brown bars = HBcrAg 3-<4 U/L, blue bars = HBcrAg 4-<6.8 U/L and red bars = HBcrAg ≥6.8 U/L.



**Figure S9:** HBcrAg (log10 IU/mL) categories by ALT (ULN), APRI and FIB-4 categories, stratified by HBeAg status.

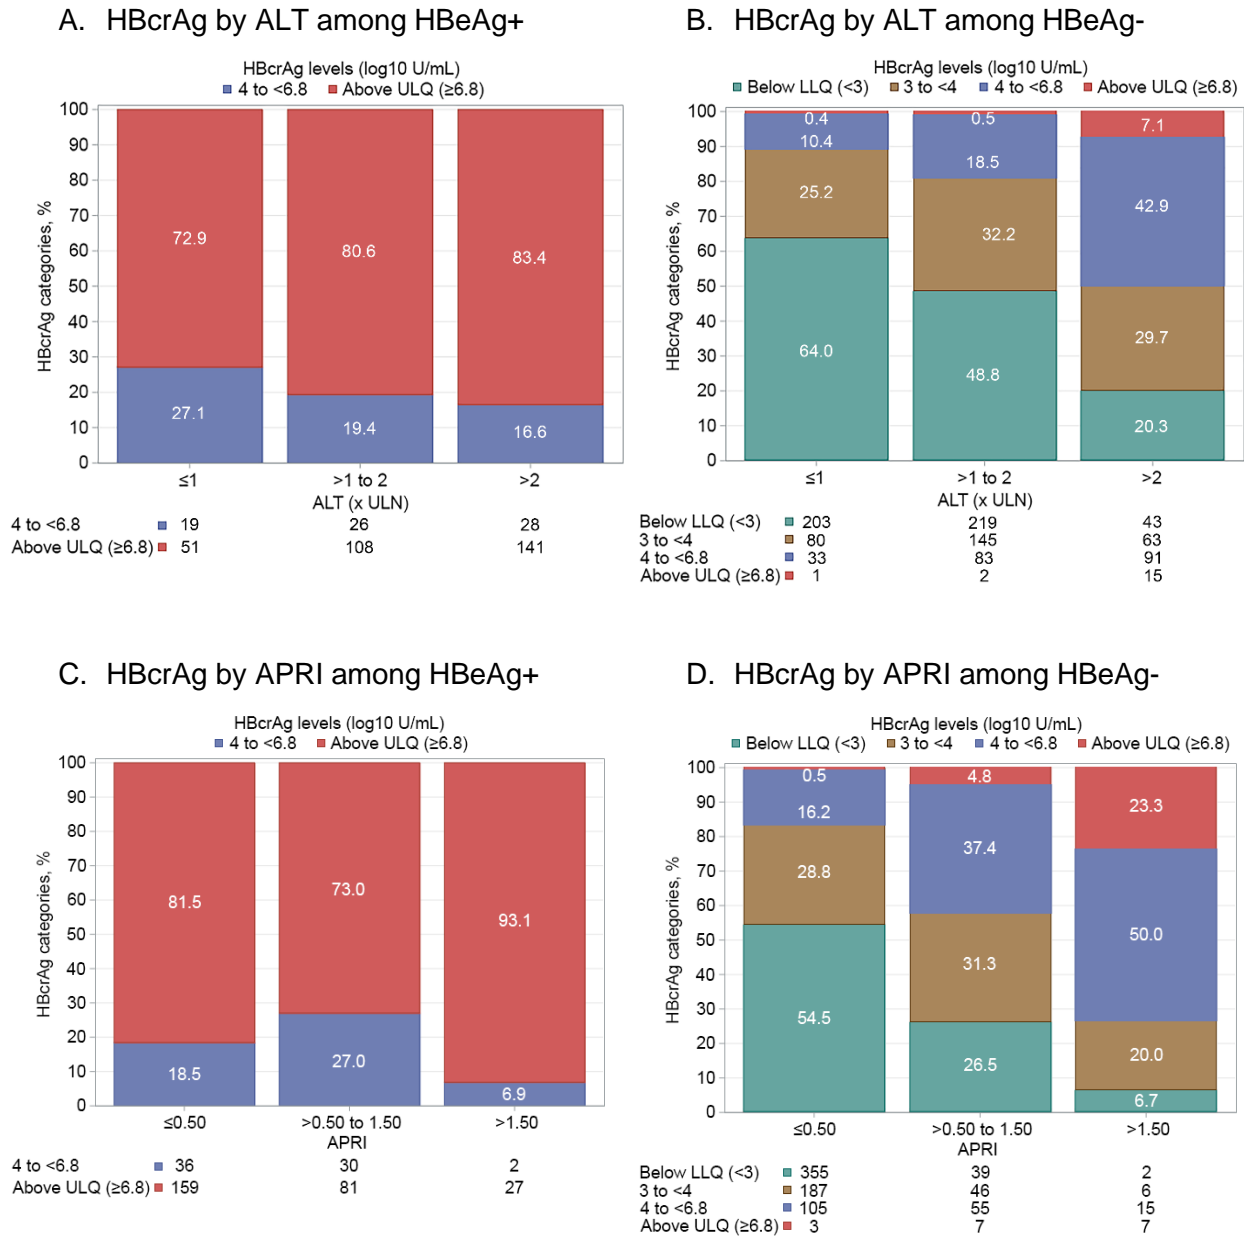

E. HBcrAg by FIB-4 among HBeAg+

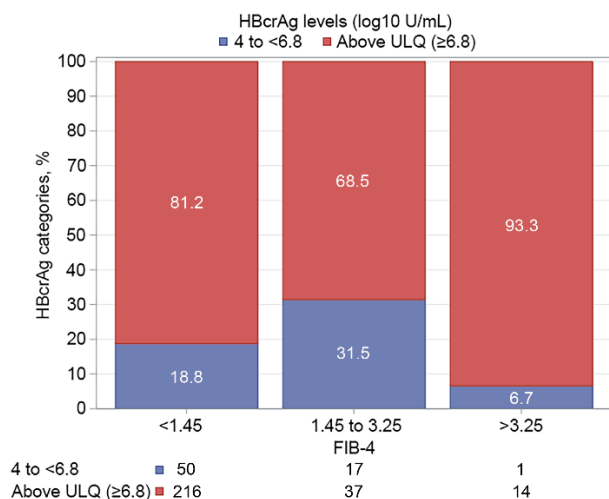

F. HBcrAg by FIB-4 among HBeAg-

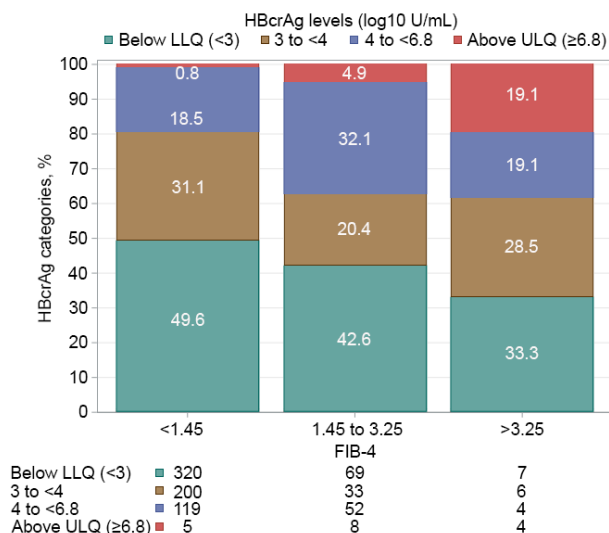

Green bars = HBcrAg below lower limit of detection, brown bars = HBcrAg 3-<4 U/L, blue bars = HBcrAg 4-<6.8 U/L and red bars = HBcrAg ≥6.8 U/L.

**Figure S10:** HBV DNA (log<sub>10</sub> U/mL) by ALT (ULN), APRI and FIB-4 categories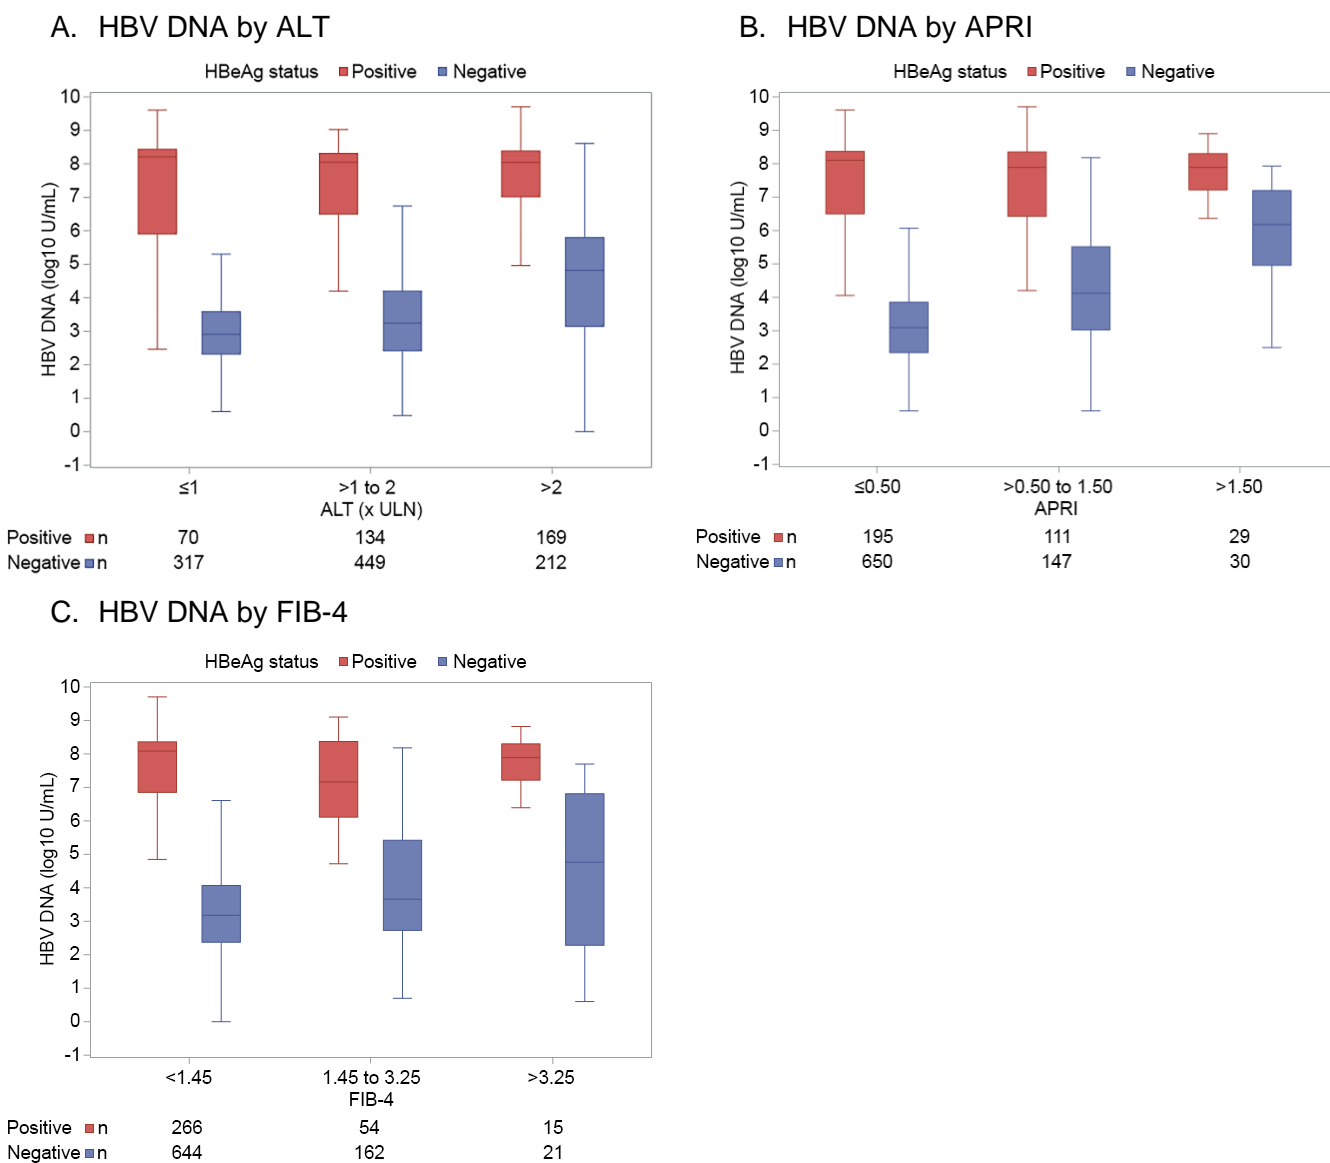

A, B and C, HBeAg positive participants represented by red boxes and HBeAg negative participants by blue boxes. In box-whisker plots, upper and lower ends of the boxes = upper and lower quartiles, horizontal line = median, and upper and lower whiskers = highest and lowest observations.

**Figure S11:** HBsAg (log<sub>10</sub> U/mL) by ALT (ULN), APRI and FIB-4 categories

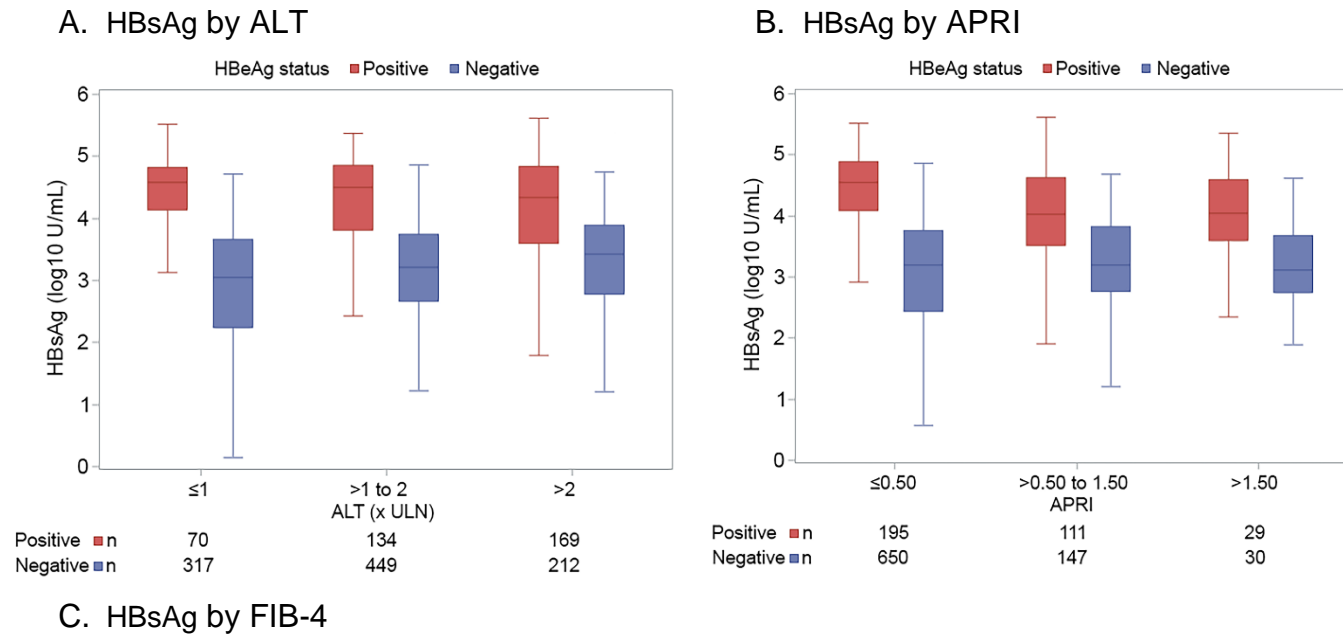

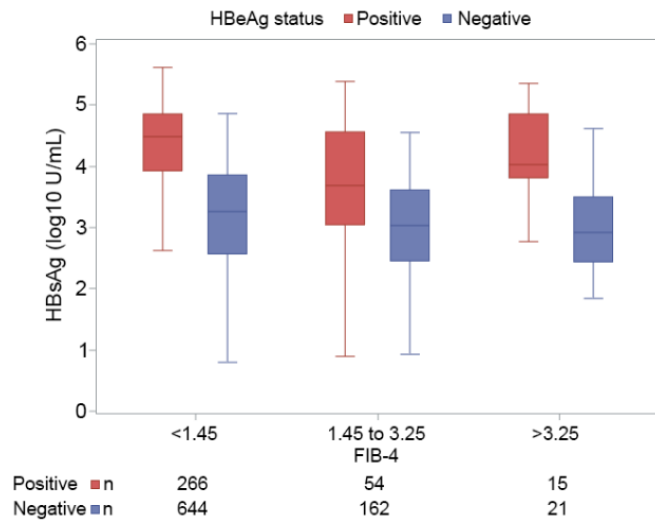

A, B and C, HBeAg positive participants represented by red boxes and HBeAg negative participants by blue boxes. In box-whisker plots, upper and lower ends of the boxes = upper and lower quartiles, horizontal line = median, and upper and lower whiskers = highest and lowest observations.

**Table S1.** Associations between HBV RNA, HBcrAg, HBV DNA and qHBsAg, respectively, with ALT, APRI and FIB-4 categories\*, respectively, among HBeAg positive participants.

|                                                         | ALT categories         |         | APRI categories   |         | FIB-4 categories  |         |
|---------------------------------------------------------|------------------------|---------|-------------------|---------|-------------------|---------|
|                                                         | Unadjusted models      |         |                   |         |                   |         |
|                                                         | OR (95% CI)            | p-value | OR (95% CI)       | p-value | OR (95% CI)       | p-value |
| <b>HBV RNA-per log<sub>10</sub> U/mL</b>                |                        | 0.007   |                   | 0.25    |                   | 0.56    |
| <b>2 vs 1</b>                                           | 1.07 (0.90-1.27)       |         | 1.04 (0.90-1.21)  |         | 0.90 (0.76-1.07)  |         |
| <b>3 vs 1</b>                                           | 1.26 (1.05-1.50)       |         | 1.24 (0.92-1.68)  |         | 1.17 (0.78-1.74)  |         |
| <b>HBcrAg (≥6.8 vs 4-&lt;6.8 log<sub>10</sub> U/mL)</b> |                        | 0.08    |                   | 0.67    |                   | 0.27    |
| <b>2 vs 1</b>                                           | 1.55 (0.79-3.05)       |         | 0.61 (0.35-1.06)  |         | 0.50 (0.26-0.97)  |         |
| <b>3 vs 1</b>                                           | 1.88 (0.97-3.65)       |         | 3.06 (0.70-13.44) |         | 3.24 (0.42-25.22) |         |
| <b>HBV DNA-per log<sub>10</sub> U/mL</b>                |                        | 0.056   |                   | 0.71    |                   | 0.59    |
| <b>2 vs 1</b>                                           | 1.02 (0.85-1.23)       |         | 0.97 (0.83-1.13)  |         | 0.90 (0.75-1.08)  |         |
| <b>3 vs 1</b>                                           | 1.17 (0.97-1.41)       |         | 1.20 (0.88-1.65)  |         | 1.19 (0.78-1.83)  |         |
| <b>qHBsAg-per log<sub>10</sub> U/mL</b>                 |                        | 0.25    |                   | 0.009   |                   | <0.001  |
| <b>2 vs 1</b>                                           | 0.92 (0.64-1.31)       |         | 0.69 (0.52-0.91)  |         | 0.53 (0.39-0.72)  |         |
| <b>3 vs 1</b>                                           | 0.83 (0.59-1.17)       |         | 0.72 (0.47-1.11)  |         | 0.88 (0.47-1.65)  |         |
|                                                         | Multivariable models** |         |                   |         |                   |         |
|                                                         | adjOR (95% CI)         | p-value | adjOR (95% CI)    | p-value | adjOR (95% CI)    | p-value |
| <b>HBV RNA-per log<sub>10</sub> U/mL</b>                |                        | <.001   |                   | 0.045   |                   | 0.29    |
| <b>2 vs 1</b>                                           | 1.09 (0.90-1.32)       |         | 1.11 (0.94-1.31)  |         | 0.91 (0.76-1.10)  |         |
| <b>3 vs 1</b>                                           | 1.39 (1.12-1.71)       |         | 1.41 (1.01-1.95)  |         | 1.27 (0.84-1.93)  |         |
| <b>HBcrAg (≥6.8 vs 4-&lt;6.8 log<sub>10</sub> U/mL)</b> |                        | 0.01    |                   | 0.66    |                   | 0.14    |
| <b>2 vs 1</b>                                           | 1.69 (0.79-3.60)       |         | 0.77 (0.42-1.40)  |         | 0.58 (0.29-1.15)  |         |
| <b>3 vs 1</b>                                           | 2.60 (1.21-5.59)       |         | 3.76 (0.83-17.01) |         | 3.25 (0.41-25.90) |         |
| <b>HBV DNA-per log<sub>10</sub> U/mL</b>                |                        | 0.008   |                   | 0.34    |                   | 0.38    |
| <b>2 vs 1</b>                                           | 1.04 (0.85-1.28)       |         | 1.02 (0.86-1.20)  |         | 0.91 (0.75-1.10)  |         |
| <b>3 vs 1</b>                                           | 1.27 (1.02-1.57)       |         | 1.28 (0.92-1.79)  |         | 1.21 (0.78-1.87)  |         |
| <b>qHBsAg-per log<sub>10</sub> U/mL</b>                 |                        | 0.71    |                   | 0.10    |                   | <0.001  |

|               |                  |  |                  |  |                  |  |
|---------------|------------------|--|------------------|--|------------------|--|
| <b>2 vs 1</b> | 0.95 (0.63-1.44) |  | 0.77 (0.57-1.04) |  | 0.52 (0.37-0.72) |  |
| <b>3 vs 1</b> | 0.91 (0.61-1.36) |  | 0.79 (0.51-1.24) |  | 0.82 (0.44-1.56) |  |

\*ALT (ULN) categories: 1:  $\leq 1.0$ -2:  $>1.0$ -2.0-3:  $>2.0$ ; APRI categories: 1:  $\leq 0.5$ -2: 0.5-2.0-3:  $>2.0$ ; FIB-4 categories: 1:  $<1.45$ -2: 1.45-3.25-2:  $>3.25$ .

\*\*Adjusted for age (years) and body mass index ( $\text{kg}/\text{m}^2$ ).

**Table S2.** Associations between HBV RNA, HBcrAg, HBV DNA and qHBsAg, respectively, with ALT, APRI and FIB-4 categories\*, respectively, among HBeAg negative participants.

|                                                         | ALT categories                |                | APRI categories       |                | FIB-4 categories      |                |
|---------------------------------------------------------|-------------------------------|----------------|-----------------------|----------------|-----------------------|----------------|
|                                                         | Unadjusted models             |                |                       |                |                       |                |
|                                                         | OR (95% CI)                   | p-value        | OR (95% CI)           | p-value        | OR (95% CI)           | p-value        |
| <b>HBV RNA-per log<sub>10</sub> U/mL</b>                |                               | <.0001         |                       | <.0001         |                       | <.0001         |
| <b>2 vs 1</b>                                           | 1.30 (1.17-1.46)              |                | 1.64 (1.45-1.86)      |                | 1.32 (1.19-1.47)      |                |
| <b>3 vs 1</b>                                           | 2.17 (1.89-2.49)              |                | 2.97 (2.30-3.85)      |                | 1.69 (1.33-2.16)      |                |
| <b>HBcrAg 3-&lt;4 vs &lt;3 log<sub>10</sub> U/mL)</b>   |                               | <.0001         |                       | <.0001         |                       | <.0001         |
| <b>2 vs 1</b>                                           | 1.68 (1.20-2.34)              |                | 2.24 (1.41-3.55)      |                | 0.77 (0.49-1.20)      |                |
| <b>3 vs 1</b>                                           | 3.72 (2.33-5.93)              |                | 5.70 (1.14-28.49)     |                | 1.37 (0.45-4.14)      |                |
| <b>HBcrAg 4-&lt;6.8 vs &lt;3 log<sub>10</sub> U/mL)</b> |                               |                |                       |                |                       |                |
| <b>2 vs 1</b>                                           | 2.33 (1.49-3.64)              |                | 4.77 (3.00-7.59)      |                | 2.03 (1.34-3.08)      |                |
| <b>3 vs 1</b>                                           | 13.02 (7.77-21.82)            |                | 25.36 (5.71-112.67)   |                | 1.54 (0.44-5.34)      |                |
| <b>HBcrAg ≥6.8 vs &lt;3 log<sub>10</sub> U/mL)</b>      |                               |                |                       |                |                       |                |
| <b>2 vs 1</b>                                           | 1.86 (0.17-20.61)             |                | 21.22 (5.28-85.39)    |                | 7.42 (2.36-23.37)     |                |
| <b>3 vs 1</b>                                           | 70.81 (9.11-550.56)           |                | -                     |                | 36.57 (8.05-166.06)   |                |
| <b>HBV DNA-per log<sub>10</sub> U/mL</b>                |                               | <.0001         |                       | <.0001         |                       | <.0001         |
| <b>2 vs 1</b>                                           | 1.27 (1.14-1.43)              |                | 1.71 (1.49-1.95)      |                | 1.38 (1.23-1.54)      |                |
| <b>3 vs 1</b>                                           | 2.19 (1.90-2.52)              |                | 3.32 (2.50-4.43)      |                | 1.62 (1.24-2.11)      |                |
| <b>qHBsAg-per log<sub>10</sub> U/mL</b>                 |                               | <.0001         |                       | 0.08           |                       | 0.01           |
| <b>2 vs 1</b>                                           | 1.26 (1.08-1.46)              |                | 1.16 (0.95-1.41)      |                | 0.81 (0.68-0.96)      |                |
| <b>3 vs 1</b>                                           | 1.46 (1.20-1.77)              |                | 1.25 (0.83-1.89)      |                | 0.84 (0.55-1.29)      |                |
|                                                         | <b>Multivariable models**</b> |                |                       |                |                       |                |
|                                                         | <b>adjOR (95% CI)</b>         | <b>p-value</b> | <b>adjOR (95% CI)</b> | <b>p-value</b> | <b>adjOR (95% CI)</b> | <b>p-value</b> |
| <b>HBV RNA-per log<sub>10</sub> U/mL</b>                |                               | <.0001         |                       | <.0001         |                       | <.0001         |



|                                              |                     |        |                     |        |                     |        |
|----------------------------------------------|---------------------|--------|---------------------|--------|---------------------|--------|
| <b>2 vs 1</b>                                | 1.35 (1.19-1.52)    |        | 1.64 (1.45-1.86)    |        | 1.33 (1.19-1.48)    |        |
| <b>3 vs 1</b>                                | 2.28 (1.97-2.64)    |        | 2.87 (2.21-3.73)    |        | 1.55 (1.20-2.00)    |        |
| <b>HBcrAg 3-&lt;4 vs &lt;3 log10 U/mL)</b>   |                     | <.0001 |                     | <.0001 |                     | <.0001 |
| <b>2 vs 1</b>                                | 4.63 (2.79-7.70)    |        | 8.20 (1.60-42.11)   |        | 1.38 (0.45-4.17)    |        |
| <b>3 vs 1</b>                                | 1.90 (1.32-2.73)    |        | 2.96 (1.81-4.84)    |        | 0.78 (0.49-1.24)    |        |
| <b>HBcrAg 4-&lt;6.8 vs &lt;3 log10 U/mL)</b> |                     |        |                     |        |                     |        |
| <b>2 vs 1</b>                                | 3.01 (1.84-4.94)    |        | 6.26 (3.80-10.31)   |        | 2.02 (1.32-3.10)    |        |
| <b>3 vs 1</b>                                | 19.13 (10.75-34.03) |        | 33.93 (7.31-157.48) |        | 1.14 (0.29-4.51)    |        |
| <b>HBcrAg ≥6.8 vs &lt;3 log10 U/mL)</b>      |                     |        |                     |        |                     |        |
| <b>2 vs 1</b>                                | 1.98 (0.18-22.14)   |        | 20.89 (4.91-88.88)  |        | 8.81 (2.58-30.10)   |        |
| <b>3 vs 1</b>                                | 69.27 (8.65-555.02) |        | -                   |        | 31.60 (5.92-168.68) |        |
| <b>HBV DNA-per log10 U/mL)</b>               |                     | <.0001 |                     | <.0001 |                     | <.0001 |
| <b>2 vs 1</b>                                | 1.34 (1.19-1.52)    |        | 1.72 (1.50-1.97)    |        | 1.37 (1.22-1.55)    |        |
| <b>3 vs 1</b>                                | 2.40 (2.05-2.80)    |        | 3.21 (2.39-4.32)    |        | 1.42 (1.06-1.89)    |        |
| <b>qHBsAg-per log10 U/mL)</b>                |                     | <.0001 |                     | 0.01   |                     | 0.008  |
| <b>2 vs 1</b>                                | 1.29 (1.09-1.52)    |        | 1.30 (1.04-1.63)    |        | 0.80 (0.67-0.95)    |        |
| <b>3 vs 1</b>                                | 1.52 (1.22-1.88)    |        | 1.41 (0.88-2.27)    |        | 0.75 (0.49-1.15)    |        |

\*ALT (ULN) categOR (95% CI)ies: 1: ≤1.0-2: >1.0-2.0-3: >2.0; APRI categOR (95% CI)ies: 1: ≤0.5-2: 0.5-2.0-3: >2.0; FIB-4 categOR (95% CI)ies: 1: <1.45-2: 1.45-3.25-2: >3.25.

\*\*Adjusted for age (years) and body mass index (kg/m<sup>2</sup>).
